# Supplementary material
Source: PubMed Central journal article supplement (PMC4931987)

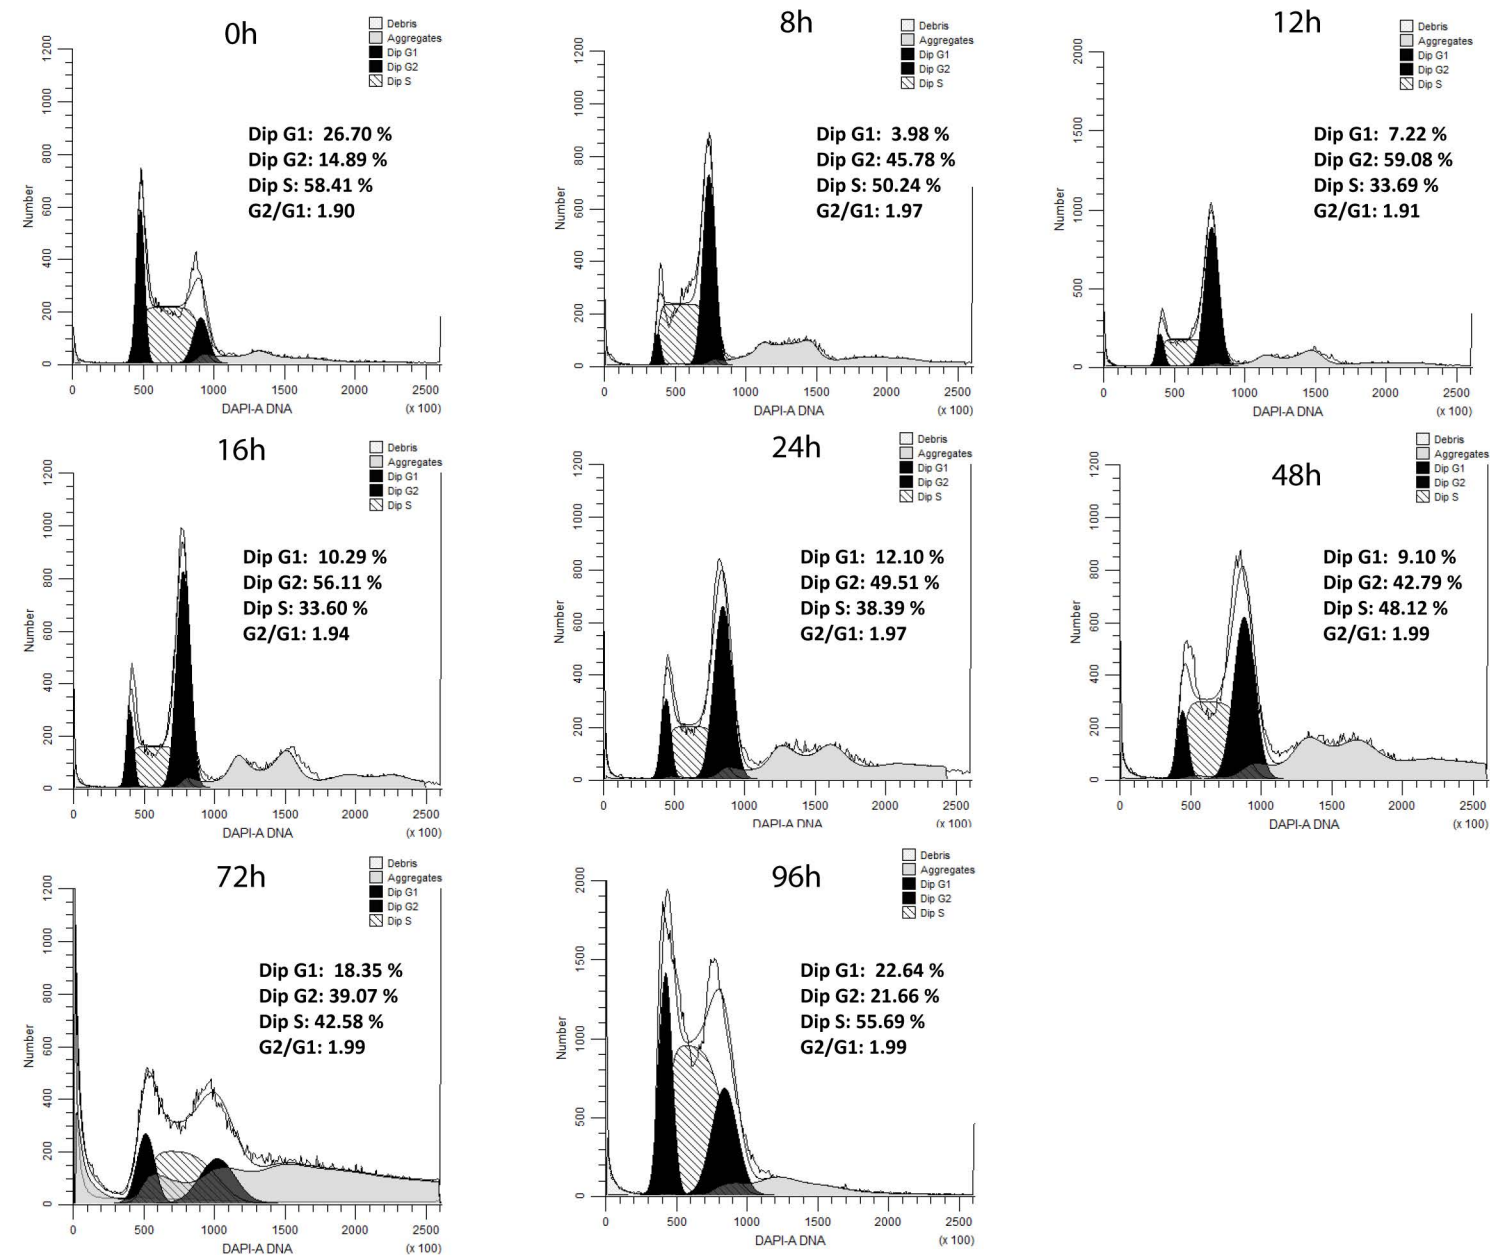

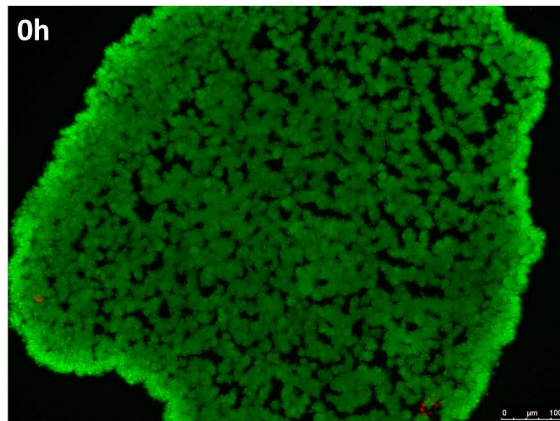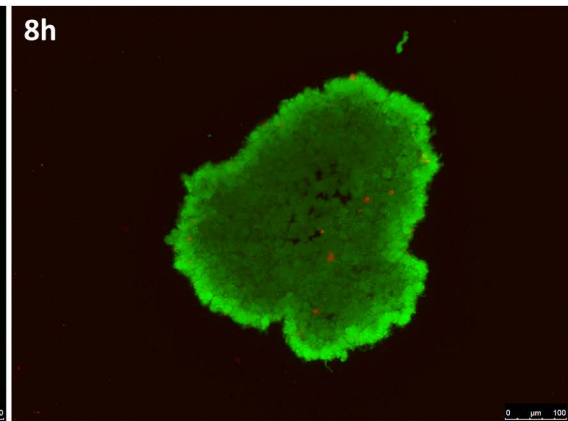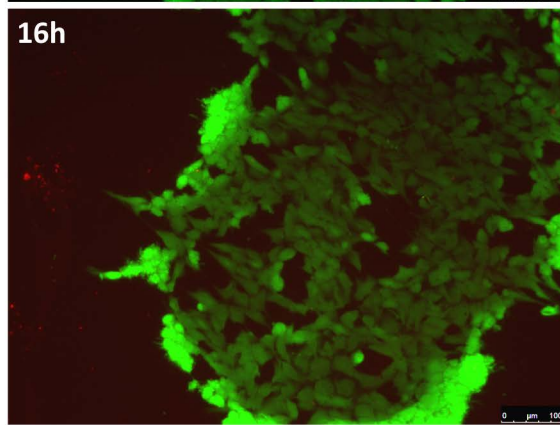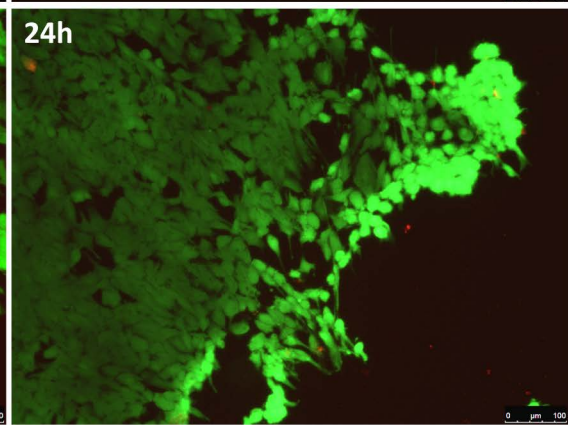

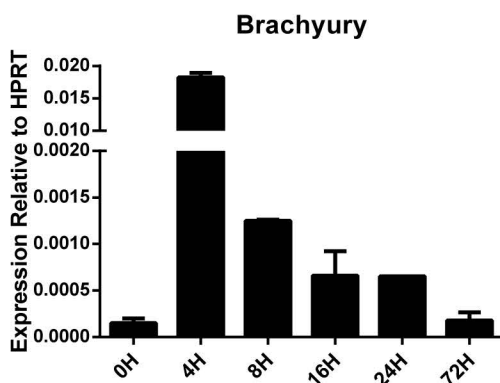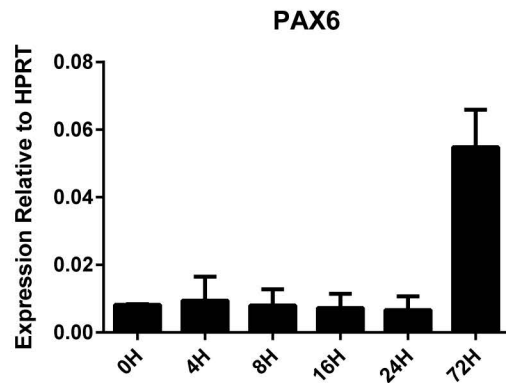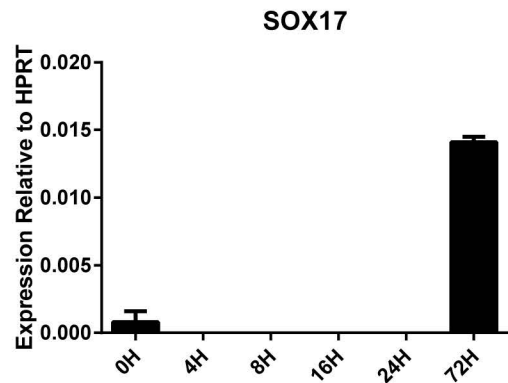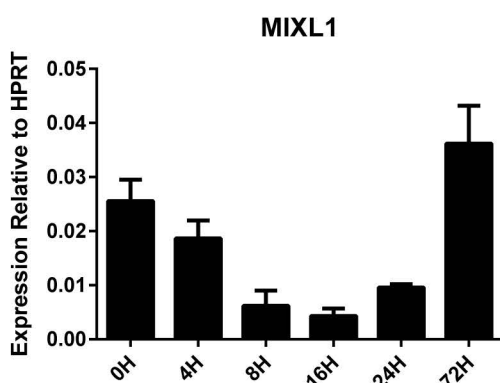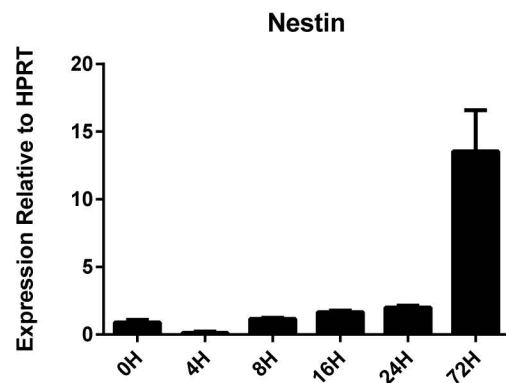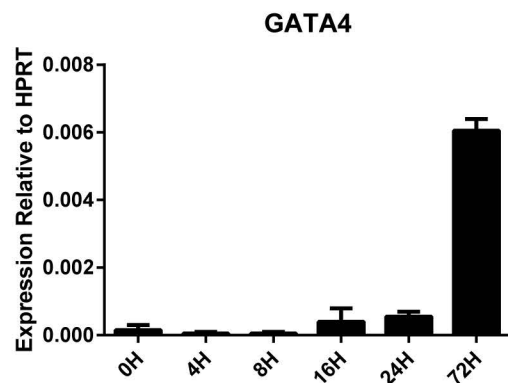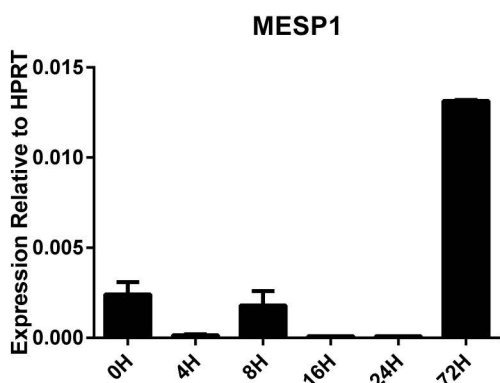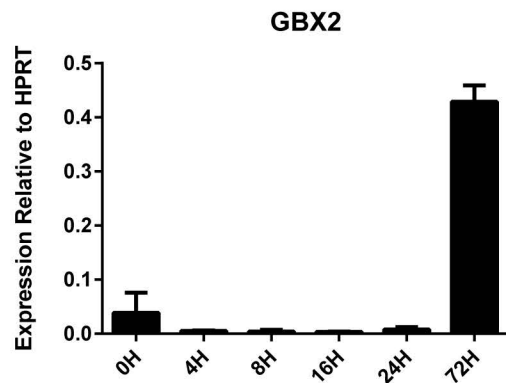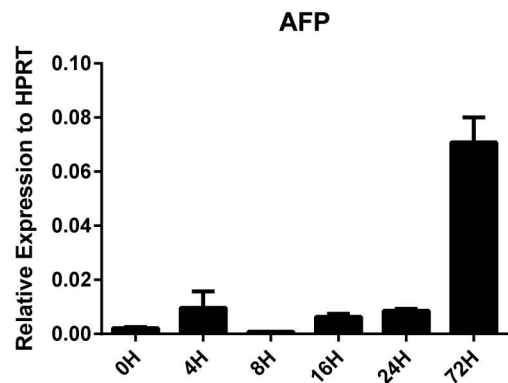

## Pluripotency Markers

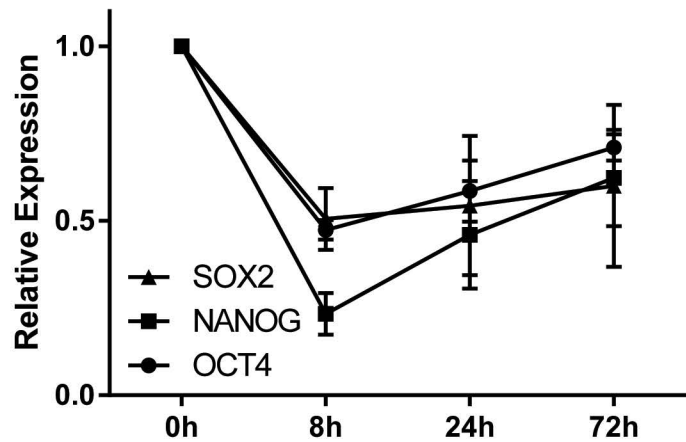

## Mesendoderm

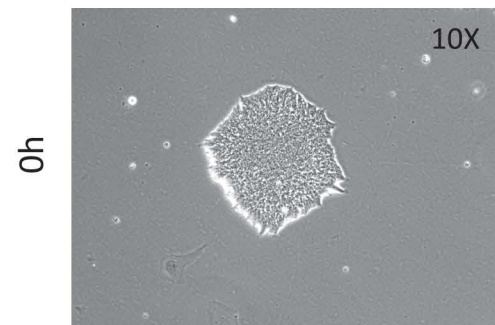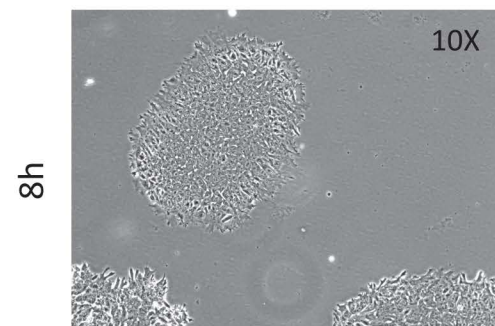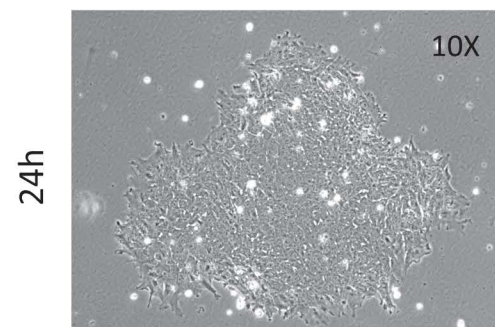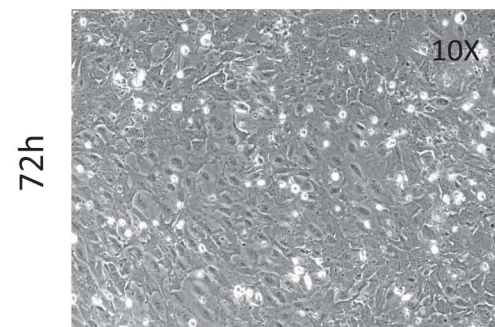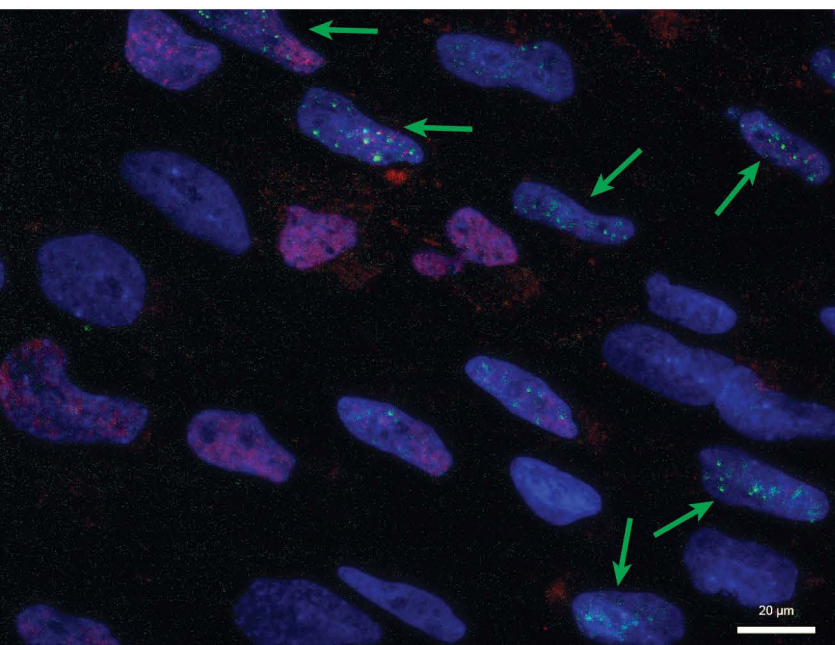

## G2 Phase Regulators

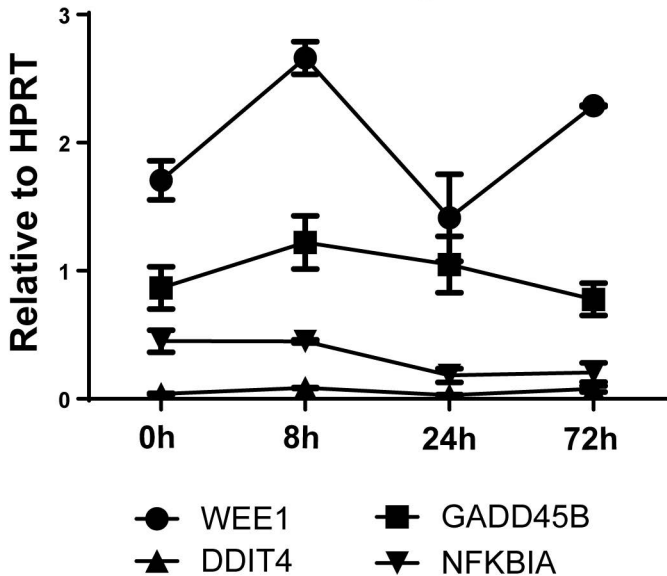

## BRACHYURY

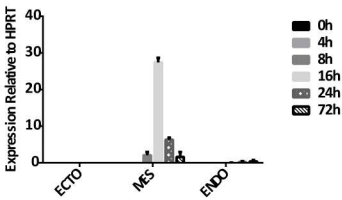

## PAX6

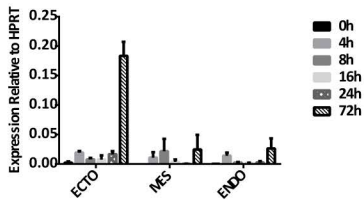

## SOX17

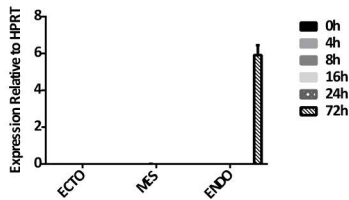

## MIXL1

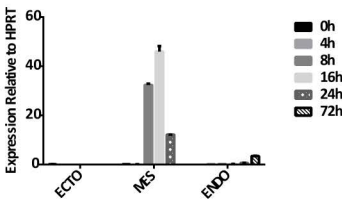

## NES

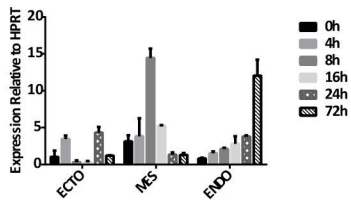

## GATA4

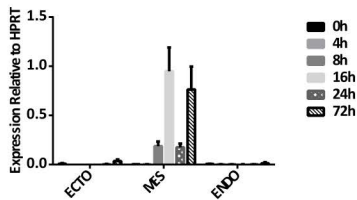

## MESP1

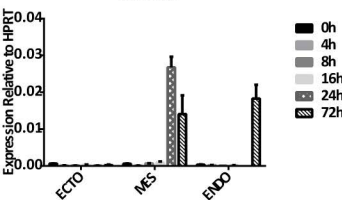

## GBX2

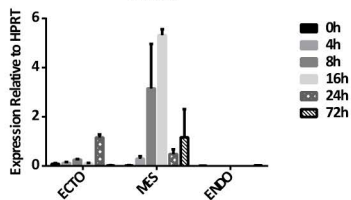

## AFP

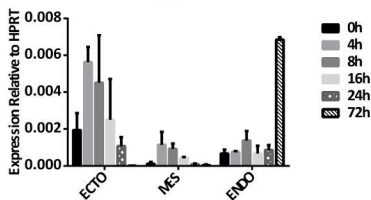

Mesoderm

Ectoderm

Endoderm

0h

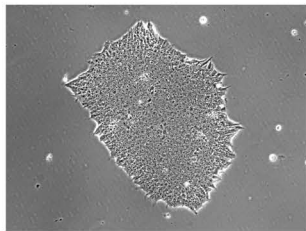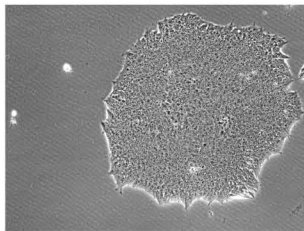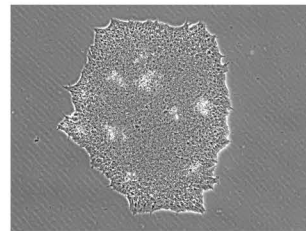

8h

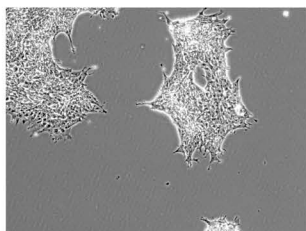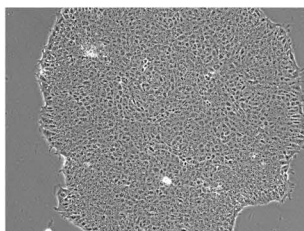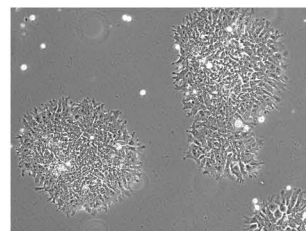

16h

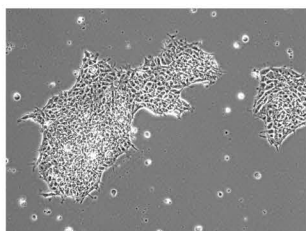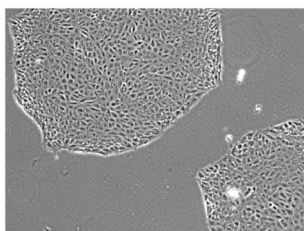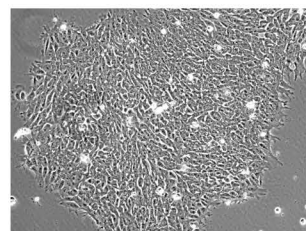

24h

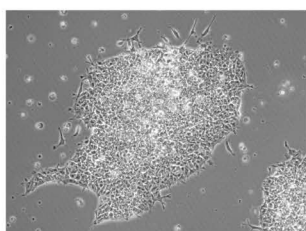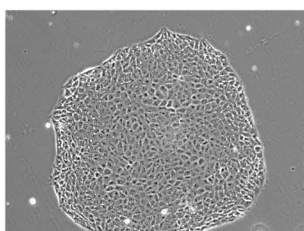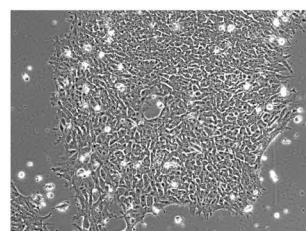

72h

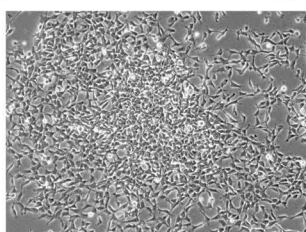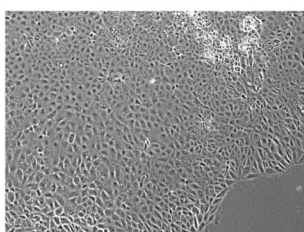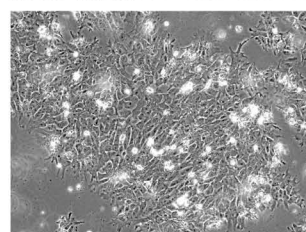

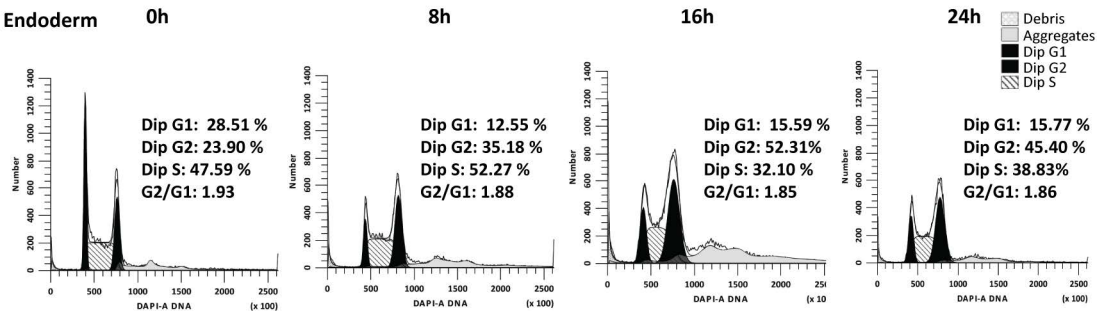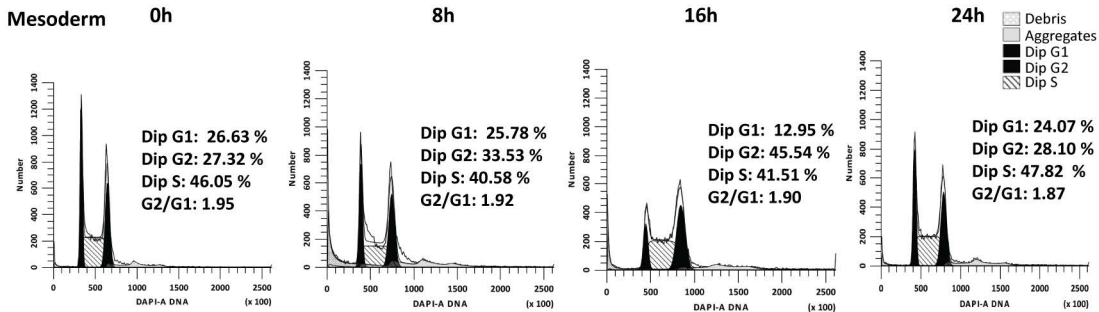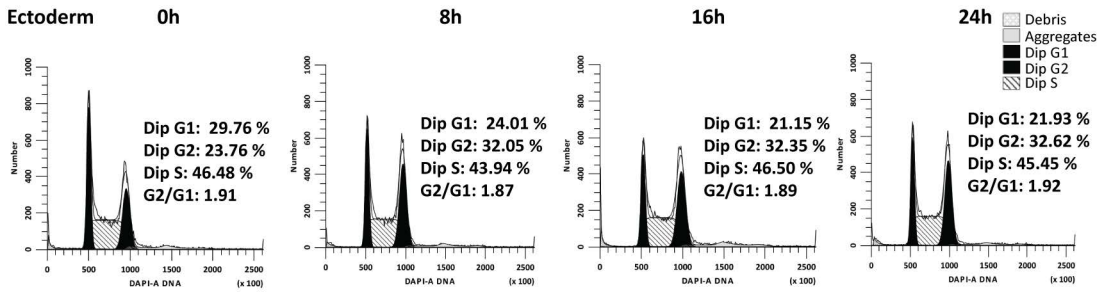



# STEIN\_Supplemental Figure S9 TOP

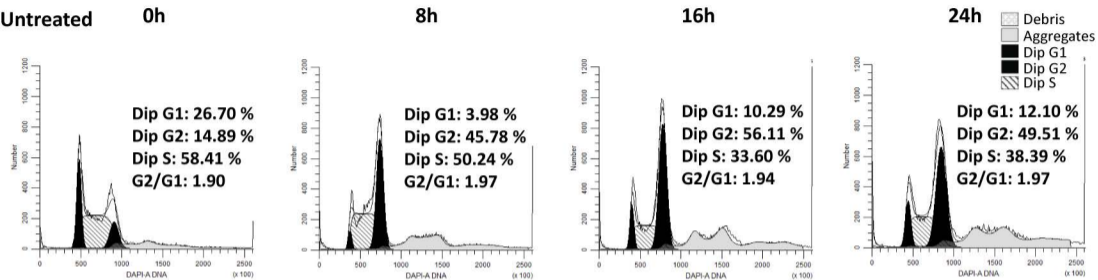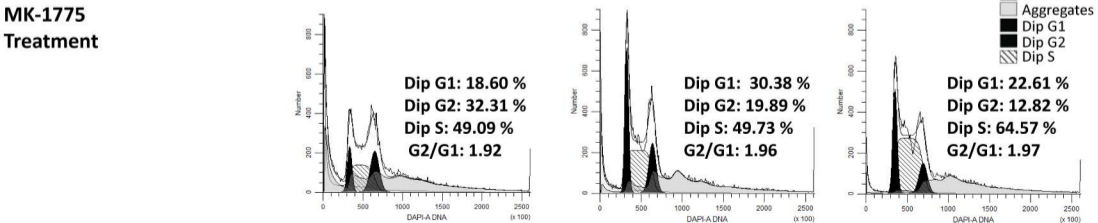

Supplement: NIHMS772398-supplement-Supp_Fig_S1-S9.pdf [file NIHMS772398-supplement-Supp_Fig_S1-S9.pdf]
